# Supplementary material for: Destabilisation of dimeric 14-3-3 proteins as a novel approach to anti-cancer therapeutics
Source: PubMed Central journal article supplement (PMC4546484; doi:10.18632/oncotarget.3995), 2015-05-04
Supplement: oncotarget-06-14522-s001.pdf [file oncotarget-06-14522-s001.pdf]

# Destabilisation of dimeric 14-3-3 proteins as a novel approach to anti-cancer therapeutics

## Supplementary Material

Supplementary Fig.1

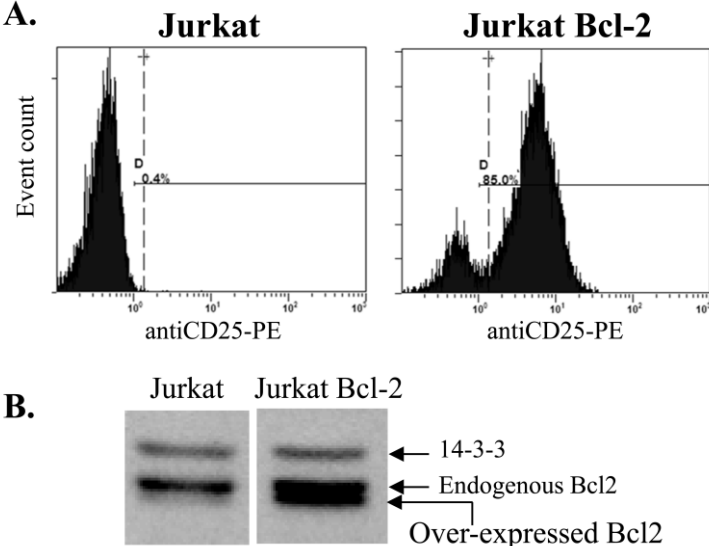

**Supplementary Figure 1** Generation of Jurkat Bcl-2 cells by lentiviral transduction. **A.** Cells transduced with lentivirus containing a Bcl-2 $\alpha$ -IRES-IL2R $\alpha$  encoding cassette were fluorescence activated cell sorted for expression of IL2R $\alpha$  using anti-CD25-PE to enrich for Bcl-2 over-expressing cells. **B.** Protein expression was further confirmed by immunoblotting for Bcl-2. 14-3-3 immunoblotting is shown as a loading control.

Supplementary Fig.2

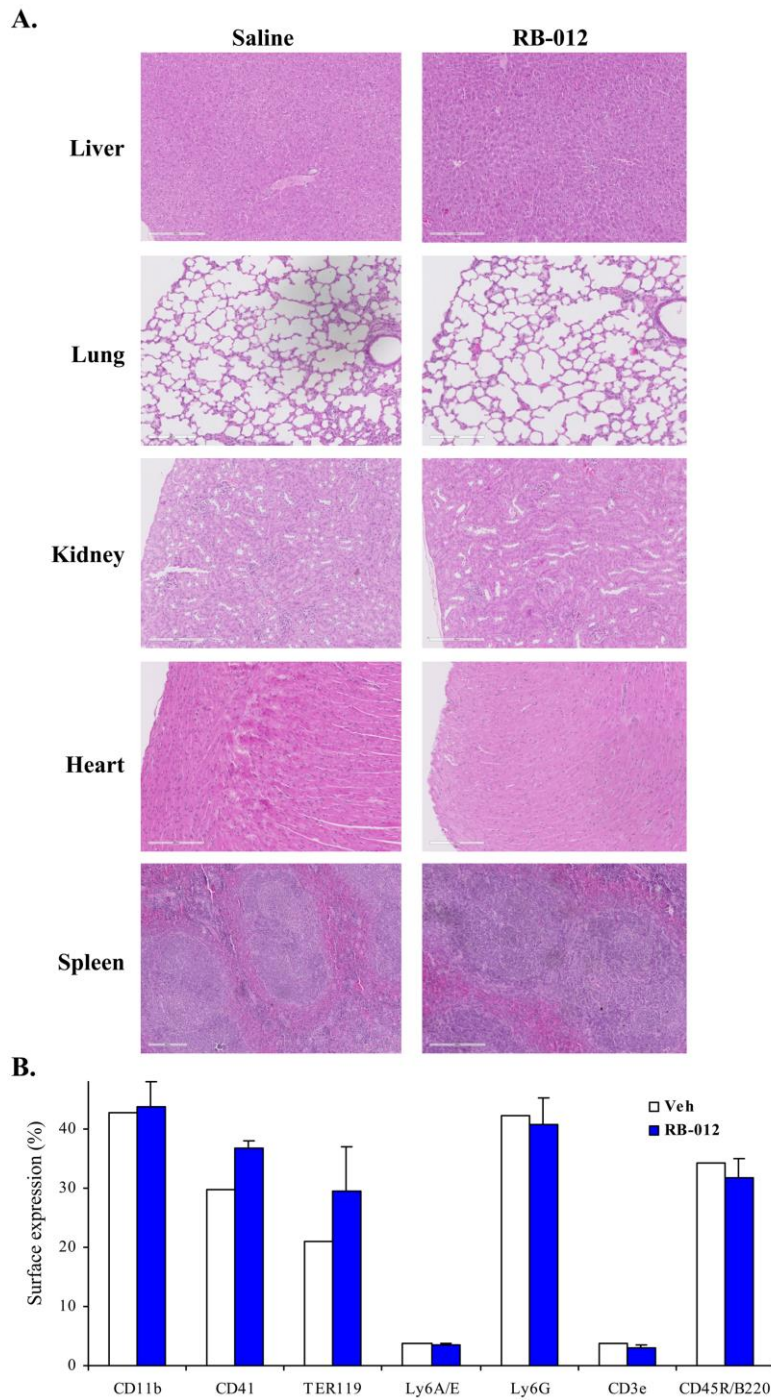

**Supplementary Figure 2 A.** Hematoxylin and eosin staining of tissues from mice treated with saline or 10mg/kg/day RB-012 for 14 days. Scale bar represents 200  $\mu$ m. **B.** Flow analysis of bone marrow samples taken from RB-012 (10mg/kg/day) or saline treated mice after 14 days. Positive staining for haemopoietic lineages is shown.
